# Supplementary material for: Metal-free phenylpropiolate–azide polycycloaddition: efficient synthesis of functional poly(phenyltriazolylcarboxylate)s
Source: Royal Society of Chemistry journal article supplement (doi:10.1039/c8py01041b), 2018-01-01
Supplement: c8py01041b1.pdf [file c8py01041b1.pdf]

*Electronic Supplementary Information*

**Metal-free phenylpropiolate-azide polycycloaddition: efficient  
synthesis of functional poly(phenyltriazolylcarboxylate)s**

Wei Yuan,<sup>a</sup> Weiwen Chi,<sup>a</sup> Ting Han,<sup>b</sup> Jun Du,<sup>a</sup> Hongkun Li,<sup>\*a</sup> Yongfang Li<sup>a</sup> and  
Ben Zhong Tang<sup>\*b</sup>

<sup>a</sup>State and Local Joint Engineering Laboratory for Novel Functional Polymeric Materials, Laboratory of Advanced Optoelectronic Materials, College of Chemistry, Chemical Engineering and Materials Science, Soochow University, Suzhou 215123, China. E-mail: hkli@suda.edu.cn

<sup>b</sup>Department of Chemistry, Hong Kong Branch of Chinese National Engineering Research Center for Tissue Restoration and Reconstruction, The Hong Kong University of Science & Technology, Clear Water Bay, Kowloon, Hong Kong, China. E-mail: tangbenz@ust.hk

**Table of Contents**

|                                                                                                                                                                                                       |    |
|-------------------------------------------------------------------------------------------------------------------------------------------------------------------------------------------------------|----|
| <b>Fig. S1</b> IR spectra of monomers <b>1b</b> (A) and <b>2</b> (B) and their polymer <b>P1b/2</b> (C).                                                                                              | S3 |
| <b>Fig. S2</b> IR spectra of monomers <b>1c</b> (A) and <b>2</b> (B) and their polymer <b>P1c/2</b> (C).                                                                                              | S3 |
| <b>Fig. S3</b> IR spectra of monomers <b>1d</b> (A) and <b>2</b> (B) and their polymer <b>P1d/2</b> (C).                                                                                              | S4 |
| <b>Fig. S4</b> IR spectra of monomers <b>1e</b> (A) and <b>2</b> (B) and their polymer <b>P1e/2</b> (C).                                                                                              | S4 |
| <b>Fig. S5</b> <sup>1</sup> H NMR spectra of monomers <b>1b</b> (A) and <b>2</b> (B) and their polymer <b>P1b/2</b> (C) in CDCl <sub>3</sub> . The solvent and water peaks are marked with asterisks. | S5 |
| <b>Fig. S6</b> <sup>1</sup> H NMR spectra of monomers <b>1c</b> (A) and <b>2</b> (B) and their polymer <b>P1c/2</b> (C) in CDCl <sub>3</sub> . The solvent and water peaks are marked with asterisks. | S5 |
| <b>Fig. S7</b> <sup>1</sup> H NMR spectra of monomers <b>1d</b> (A) and <b>2</b> (B) and their polymer <b>P1d/2</b> (C) in CDCl <sub>3</sub> . The solvent and water peaks are marked with asterisks. | S6 |
| <b>Fig. S8</b> <sup>1</sup> H NMR spectra of monomers <b>1e</b> (A) and <b>2</b> (B) and their polymer <b>P1e/2</b> (C) in CDCl <sub>3</sub> . The solvent and water peaks are marked with asterisks. | S6 |

**Fig. S9**  $^{13}\text{C}$  NMR spectra of monomers **1b** (A) and **2** (B) and their polymer **P1b/2** (C)

in  $\text{CDCl}_3$ . The solvent peaks are marked with asterisks. S7

**Fig. S10**  $^{13}\text{C}$  NMR spectra of monomer **1c** (A) and **2** (B) and their polymer **P1c/2** (C)

in  $\text{CDCl}_3$ . The solvent peaks are marked with asterisks. S7

**Fig. S11**  $^{13}\text{C}$  NMR spectra of monomers **1d** (A) and **2** (B) and their polymer **P1d/2** (C)

in  $\text{CDCl}_3$ . The solvent peaks are marked with asterisks. S8

**Fig. S12**  $^{13}\text{C}$  NMR spectra of monomers **1e** (A) and **2** (B) and their polymer **P1e/2** (C)

in  $\text{CDCl}_3$ . The solvent peaks are marked with asterisks. S8

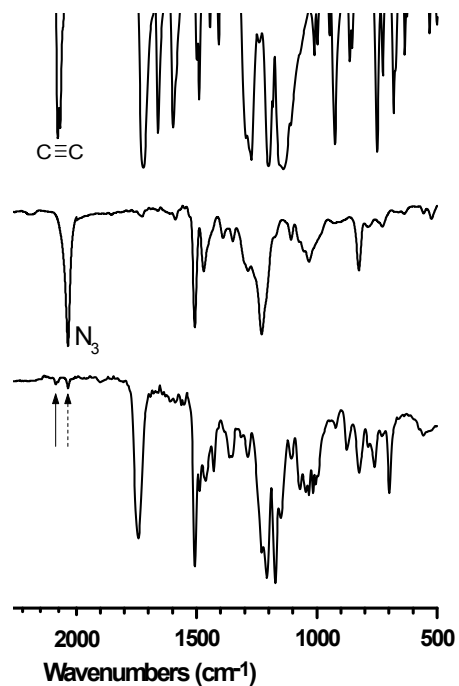

**Fig. S1** IR spectra of monomers **1b** (A) and **2** (B) and their polymer **P1b/2** (C).

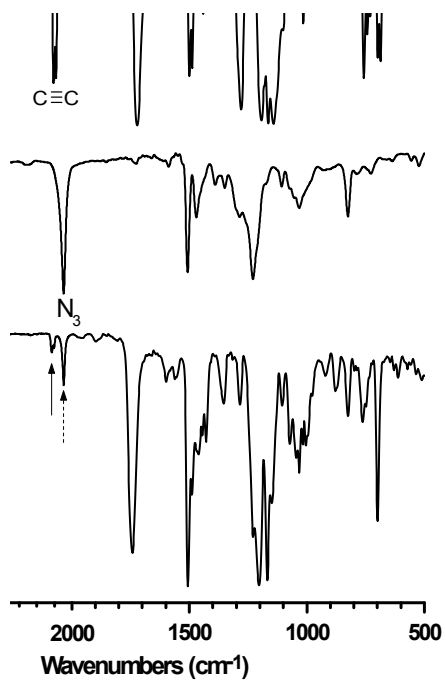

**Fig. S2** IR spectra of monomers **1c** (A) and **2** (B) and their polymer **P1c/2** (C).

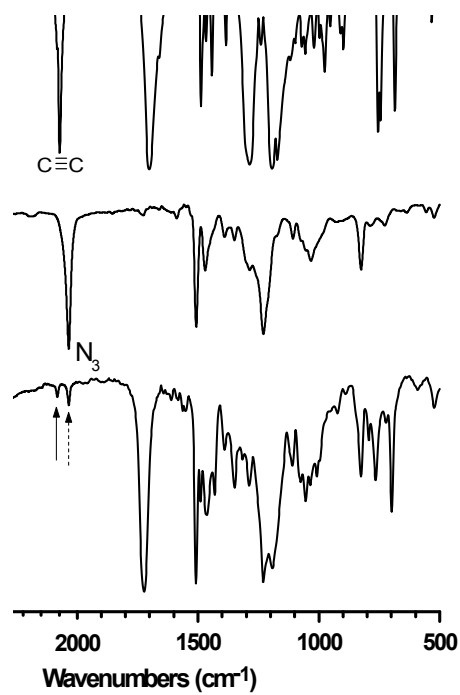

**Fig. S3** IR spectra of monomers **1d** (A) and **2** (B) and their polymer **P1d/2** (C).

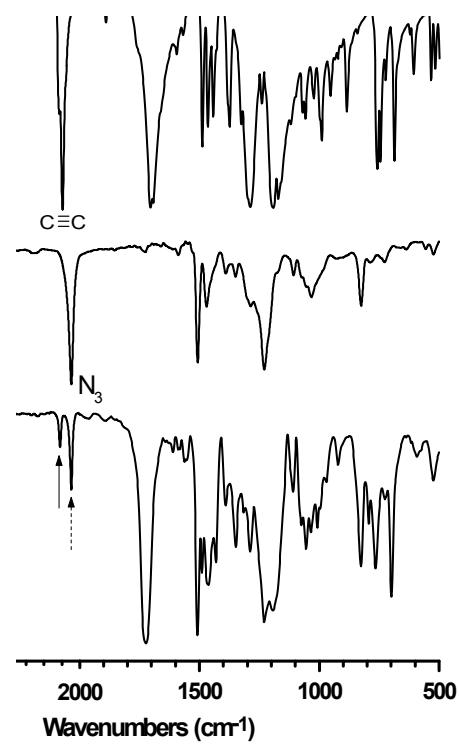

**Fig. S4** IR spectra of monomers **1e** (A) and **2** (B) and their polymer **P1e/2** (C).

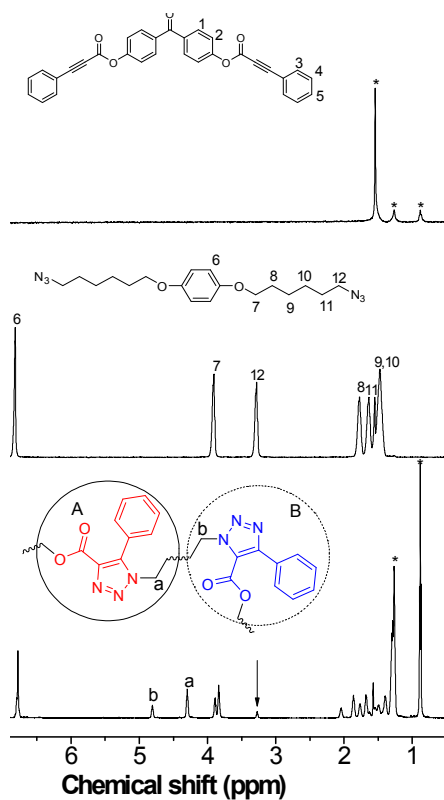

**Fig. S5**  $^1\text{H}$  NMR spectra of monomers **1b** (A) and **2** (B) and their polymer **P1b/2** (C) in  $\text{CDCl}_3$ . The solvent and water peaks are marked with asterisks.

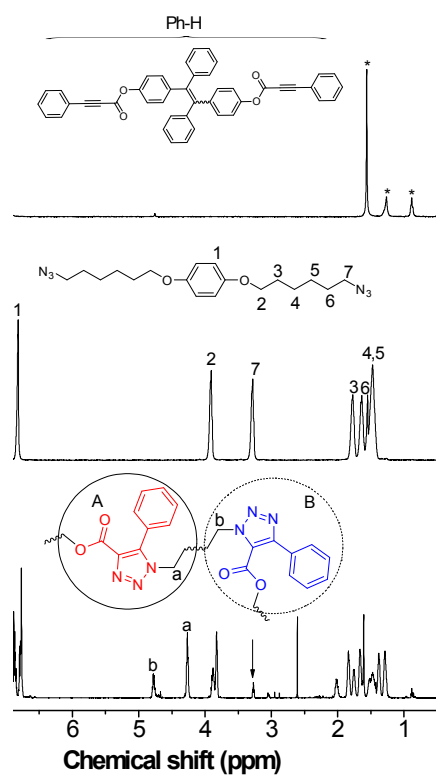

**Fig. S6**  $^1\text{H}$  NMR spectra of monomers **1c** (A) and **2** (B) and their polymer **P1c/2** (C) in  $\text{CDCl}_3$ . The solvent and water peaks are marked with asterisks.

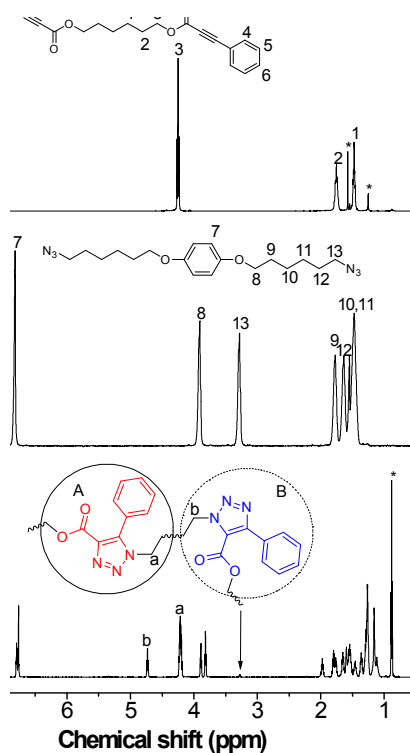

**Fig. S7** <sup>1</sup>H NMR spectra of monomers **1d** (A) and **2** (B) and their polymer **P1d/2** (C) in CDCl<sub>3</sub>. The solvent and water peaks are marked with asterisks.

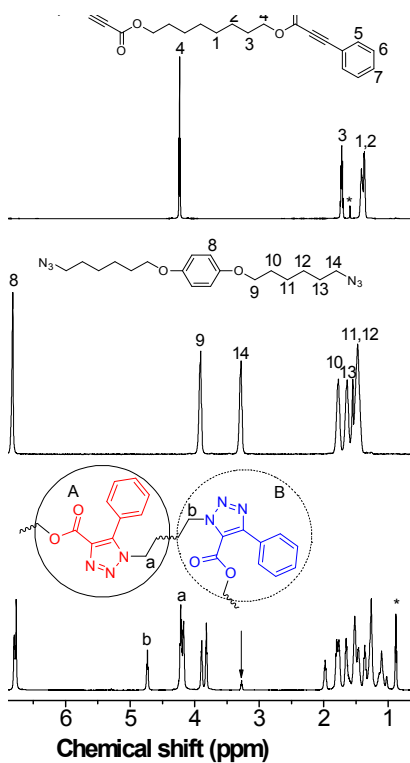

**Fig. S8** <sup>1</sup>H NMR spectra of monomers **1e** (A) and **2** (B) and their polymer **P1e/2** (C) in CDCl<sub>3</sub>. The solvent and water peaks are marked with asterisks.

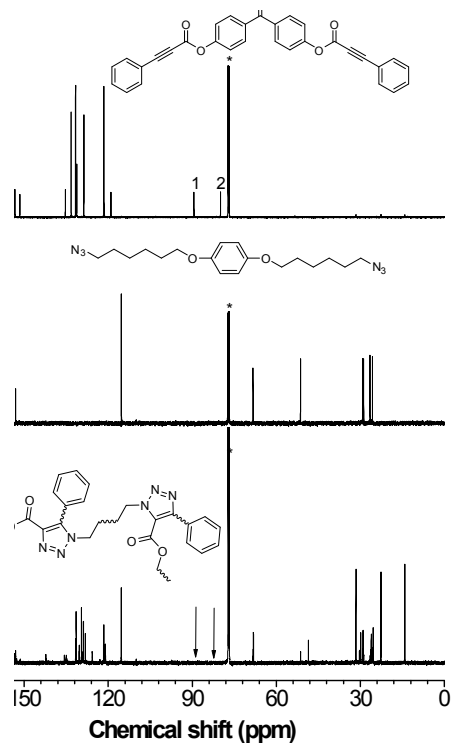

**Fig. S9**  $^{13}\text{C}$  NMR spectra of monomers **1b** (A) and **2** (B) and their polymer **P1b/2** (C) in  $\text{CDCl}_3$ . The solvent peaks are marked with asterisks.

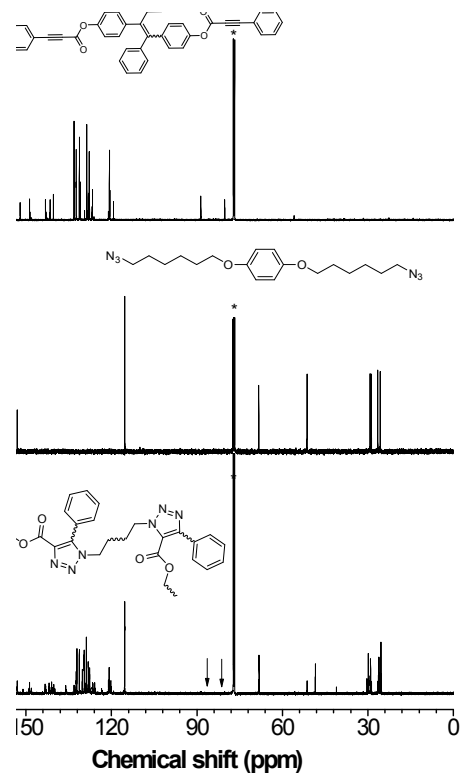

**Fig. S10**  $^{13}\text{C}$  NMR spectra of monomer **1c** (A) and **2** (B) and their polymer **P1c/2** (C) in  $\text{CDCl}_3$ . The solvent peaks are marked with asterisks.

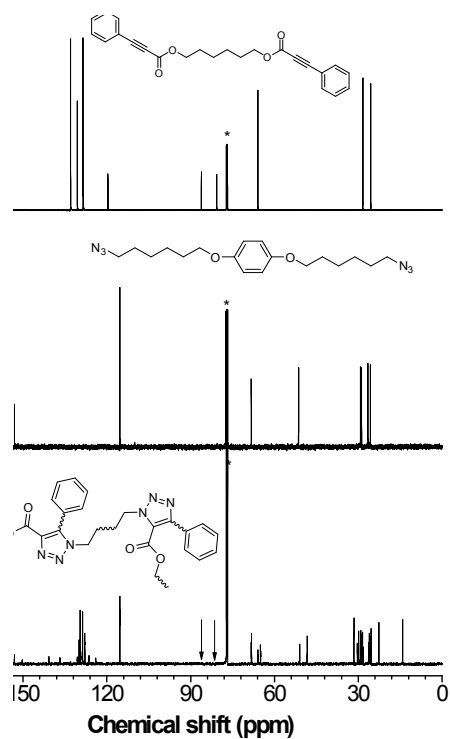

**Fig. S11**  $^{13}\text{C}$  NMR spectra of monomers **1d** (A) and **2** (B) and their polymer **P1d/2** (C) in  $\text{CDCl}_3$ . The solvent peaks are marked with asterisks.

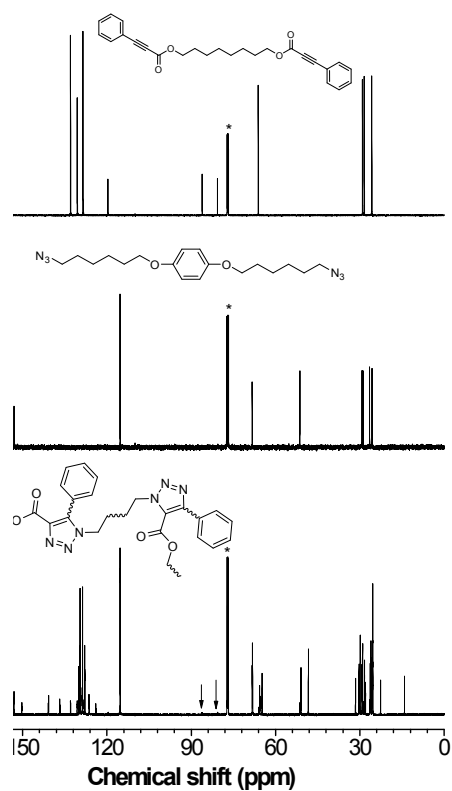

**Fig. S12**  $^{13}\text{C}$  NMR spectra of monomers **1e** (A) and **2** (B) and their polymer **P1e/2** (C) in  $\text{CDCl}_3$ . The solvent peaks are marked with asterisks.
